# Supplementary material
Source: publisher site journal article supplement (https://zse.pensoft.net/article/4819/download/suppl/31/)
Supplement: Supplementary file 1

## Sheet: qry_final
institutionCode	catalogNumber	Phylum	Class	Order	Family	Genus	specificEpithet	scientificName	namePublishedIn	typeStatus	individualCount	waterBody	Country	State	Locality	decimalLatitude	decimalLongitude	minimumDepthInMeters	maximumDepthInMeters	eventDate	recordedBy	fieldNumber	samplingProtocol	habitat	Sex
AM	P.47887	Crustacea	Malacostraca	Amphipoda	Scopelocheiridae	Paracallisoma	woolgoolga	Paracallisoma woolgoolga Kilgallen & Lowry, mss			3		Australia	Queensland	due east of Mooloolaba	-26.6038	153.837	1006		1994-08-02/1994-08-03	J.K. Lowry & K. Dempsey	QLD-1140	baited trap
AM	P.48095	Crustacea	Malacostraca	Amphipoda	Scopelocheiridae	Paracallisoma	woolgoolga	Paracallisoma woolgoolga Kilgallen & Lowry, mss			564		Australia	New South Wales	north-east of Coffs Harbour	-30.1823	153.538	963		1994-08-11/1994-08-12	P.B. Berents| R.T. Springthorpe| W. Vader	NSW-862	baited trap
AM	P.48103	Crustacea	Malacostraca	Amphipoda	Scopelocheiridae	Paracallisoma	zivianii	Paracallisoma zivianii Kilgallen & Lowry, mss			3		Australia	New South Wales	north-east of Coffs Harbour	-30.1823	153.538	963		1993-08-11/1993-08-12	P.B. Berents| R.T. Springthorpe| W. Vader	NSW-862	baited trap
AM	P.48121	Crustacea	Malacostraca	Amphipoda	Scopelocheiridae	Paracallisoma	woolgoolga	Paracallisoma woolgoolga Kilgallen & Lowry, mss			175		Australia	New South Wales	north-east of Coffs Harbour	-30.1823	153.538	963		1994-08-11/1994-08-12	P.B. Berents| R.T. Springthorpe| W. Vader	NSW-863	baited trap
AM	P.48127	Crustacea	Malacostraca	Amphipoda	Scopelocheiridae	Paracallisoma	zivianii	Paracallisoma zivianii Kilgallen & Lowry, mss			4		Australia	New South Wales	north-east of Coffs Harbour	-30.1823	153.538	963		1993-08-11/1993-08-12	P.B. Berents| R.T. Springthorpe| W. Vader	NSW-863	baited trap
AM	P.49808	Crustacea	Malacostraca	Amphipoda	Scopelocheiridae	Paracallisoma	woolgoolga	Paracallisoma woolgoolga Kilgallen & Lowry, mss			480		Australia	New South Wales	north-east of Coffs Harbour	-30.1813	153.537	1000		1994-08-12/1994-08-13	P.B. Berents| R.T. Springthorpe| W. Vader	NSW-876	baited trap
AM	P.49817	Crustacea	Malacostraca	Amphipoda	Scopelocheiridae	Paracallisoma	zivianii	Paracallisoma zivianii Kilgallen & Lowry, mss			1		Australia	New South Wales	north-east of Coffs Harbour	-30.1813	153.537	1000		1993-08-12/1993-08-13	P.B. Berents| R.T. Springthorpe| W. Vader	NSW-876	baited trap
AM	P.49827	Crustacea	Malacostraca	Amphipoda	Scopelocheiridae	Paracallisoma	woolgoolga	Paracallisoma woolgoolga Kilgallen & Lowry, mss			237		Australia	New South Wales	north-east of Coffs Harbour	-30.1813	153.537	1000		1993-08-12/1993-08-14	P.B. Berents| R.T. Springthorpe| W. Vader	NSW-876	baited trap
AM	P.49831	Crustacea	Malacostraca	Amphipoda	Scopelocheiridae	Paracallisoma	zivianii	Paracallisoma zivianii Kilgallen & Lowry, mss			4		Australia	New South Wales	north-east of Coffs Harbour	-30.1813	153.537	1000		1993-08-12/1993-08-13	P.B. Berents| R.T. Springthorpe| W. Vader	NSW-877	baited trap
AM	P.50024	Crustacea	Malacostraca	Amphipoda	Scopelocheiridae	Paracallisoma	woolgoolga	Paracallisoma woolgoolga Kilgallen & Lowry, mss			6		Australia	New South Wales	north east of Coffs Harbour	-30.1823	153.538	1000		1994-09-08/1994-09-09	J.K. Lowry| K. Dempsey	NSW-999	baited trap	59.2% mud, 40.8% sand
AM	P.50067	Crustacea	Malacostraca	Amphipoda	Scopelocheiridae	Paracallisoma	woolgoolga	Paracallisoma woolgoolga Kilgallen & Lowry, mss			26		Australia	New South Wales	north-east of Coffs Harbour	-30.1823	153.538	1000		1994-09-09/1994-09-10	J.K. Lowry| K. Dempsey	NSW-1021	baited trap
AM	P.50082	Crustacea	Malacostraca	Amphipoda	Scopelocheiridae	Paracallisoma	woolgoolga	Paracallisoma woolgoolga Kilgallen & Lowry, mss			2		Australia	New South Wales	north-east of Coffs Harbour	-30.1823	153.538	1000		1994-09-09/1994-09-11	J.K. Lowry| K. Dempsey	NSW-1022	baited trap
AM	P.50236	Crustacea	Malacostraca	Amphipoda	Scopelocheiridae	Paracallisoma	zivianii	Paracallisoma zivianii Kilgallen & Lowry, mss			6		Australia	Queensland	east of Flynn Reef	-16.6302	146.385	1000		1993-06-06/1993-06-07	J.K. Lowry| P. Freewater| W. Vader	QLD-931/SEAS	baited trap
AM	P.50245	Crustacea	Malacostraca	Amphipoda	Scopelocheiridae	Paracallisoma	zivianii	Paracallisoma zivianii Kilgallen & Lowry, mss			3		Australia	Queensland	east of Flynn Reef	-16.6302	146.385	1000		1993-06-06/1993-06-07	J.K. Lowry| P. Freewater| W. Vader	QLD-932/SEAS	baited trap
AM	P.51126	Crustacea	Malacostraca	Amphipoda	Scopelocheiridae	Paracallisoma	woolgoolga	Paracallisoma woolgoolga Kilgallen & Lowry, mss			1		Australia	New South Wales	north-east of Coffs Harbour	-30.2473	153.459	200		1993-08-11/1993-08-12	P.B. Berents| R.T. Springthorpe| W. Vader	NSW-869	baited trap
AM	P.52658	Crustacea	Malacostraca	Amphipoda	Scopelocheiridae	Paracallisoma	woolgoolga	Paracallisoma woolgoolga Kilgallen & Lowry, mss			17		Australia	New South Wales	north-east of Coffs Harbour	-30.1813	153.537	1000		1993-08-12/1993-08-13	P.B. Berents| R.T. Springthorpe| W. Vader	NSW-876	baited trap
AM	P.69088	Crustacea	Malacostraca	Amphipoda	Scopelocheiridae	Paracallisoma	woolgoolga	Paracallisoma woolgoolga Kilgallen & Lowry, mss		Holotype of Paracallisoma woolgoolga	1		Australia	New South Wales	north-east of Coffs Harbour	-30.1813	153.537	1000		1993-08-12/1993-08-13	P.B. Berents| R.T. Springthorpe| W. Vader	NSW-877	baited trap		Female
AM	P.69089	Crustacea	Malacostraca	Amphipoda	Scopelocheiridae	Paracallisoma	woolgoolga	Paracallisoma woolgoolga Kilgallen & Lowry, mss		Paratype of Paracallisoma woolgoolga	1		Australia	New South Wales	north-east of Coffs Harbour	-30.1813	153.537	1000		1993-08-12/1993-08-13	P.B. Berents| R.T. Springthorpe| W. Vader	NSW-877	baited trap		Male
AM	P.69090	Crustacea	Malacostraca	Amphipoda	Scopelocheiridae	Paracallisoma	woolgoolga	Paracallisoma woolgoolga Kilgallen & Lowry, mss		Paratype of Paracallisoma woolgoolga			Australia	New South Wales	north-east of Coffs Harbour	-30.1813	153.537	1000		1993-08-12/1993-08-13	P.B. Berents| R.T. Springthorpe| W. Vader	NSW-877	baited trap
AM	P.69091	Crustacea	Malacostraca	Amphipoda	Scopelocheiridae	Paracallisoma	zivianii	Paracallisoma zivianii Kilgallen & Lowry, mss		Holotype of Paracallisoma zivianii	1		Australia	Queensland	east of Flynn Reef	-16.6302	146.385	1000		1993-06-07/1993-06-08	J.K. Lowry| P. Freewater| W. Vader	QLD-950/SEAS	baited trap		Male
AM	P.69092	Crustacea	Malacostraca	Amphipoda	Scopelocheiridae	Paracallisoma	zivianii	Paracallisoma zivianii Kilgallen & Lowry, mss		Paratype of Paracallisoma zivianii	1		Australia	Queensland	east of Flynn Reef	-16.6302	146.385	1000		1993-06-06/1993-06-07	J.K. Lowry| P. Freewater| W. Vader	QLD-931/SEAS	baited trap
AM	P.73706	Crustacea	Malacostraca	Amphipoda	Scopelocheiridae	Paracallisoma	woolgoolga	Paracallisoma woolgoolga Kilgallen & Lowry, mss			20	Tasman Sea	Australia	Tasmania	76.8km south-southeast of South East Cape, Main Pedra Hill	-44.26	147.13	1312		1997-01-21/1997-01-24	CSIRO party on FRV "Southern Surveyor"	SS01/97/08	baited trap
AM	P.73707	Crustacea	Malacostraca	Amphipoda	Scopelocheiridae	Paracallisoma	woolgoolga	Paracallisoma woolgoolga Kilgallen & Lowry, mss				Tasman Sea	Australia	Tasmania	82.8 km south-southeast of South East Cape, Hill U	-44.32	147.12	1083	1448	1997-01-27/1997-01-28	CSIRO party on FRV "Southern Surveyor"	SS01/97/41	baited trap
AM	P.73708	Crustacea	Malacostraca	Amphipoda	Scopelocheiridae	Paracallisoma	woolgoolga	Paracallisoma woolgoolga Kilgallen & Lowry, mss			132	Tasman Sea	Australia	Tasmania	Hill D1, south-southeast of South East Cape	-44.39	147.27	1942		1997-01-31	CSIRO party on FRV "Southern Surveyor"	SS01/97/65	baited trap
AM	P.69087	Crustacea	Malacostraca	Amphipoda	Scopelocheiridae	Austrocallisoma	jerryi	Austrocallisoma jerryi Kilgallen & Lowry, mss		Holotype of Austrocallisoma jerryi	1		Australia	New South Wales	east of Sydney	-33.7416667 to -34.1483333	152.4066667 to 152.1613889	0	1800	1989-04-27/1989-04-28	J.R. Paxton		Isaacs-Kidd midwater trawl		female
AM	P.70171	Crustacea	Malacostraca	Amphipoda	Scopelocheiridae	Austrocallisoma	jerryi	Austrocallisoma jerryi Kilgallen & Lowry, mss		Paratype of Austrocallisoma jerryi	1		Australia	New South Wales	east of Sydney	-33.875	152.65 to 152.0983333	0	1800	1989-04-27	J.R. Paxton		Isaacs-Kidd midwater trawl		female
